# Supplementary material for: Study of nusinersen metabolites in the cerebrospinal fluid of children with spinal muscular atrophy using ultra-high-performance liquid chromatography coupled with quadrupole-time-of-flight mass spectrometry
Source: Royal Society of Chemistry journal article supplement (doi:10.1039/d4an00436a), 2024-01-01
Supplement: d4an00436a1.pdf [file d4an00436a1.pdf]

# Study of nusinersen metabolites in cerebrospinal fluid of children with spinal muscular atrophy using ultra-high-performance liquid chromatography coupled with quadrupole-time-of-flight mass spectrometry

Sylwia Studzińska<sup>a,b\*</sup>, Oliwia Błachowicz<sup>a</sup>, Szymon Bocian<sup>a</sup>, Oktawia Kalisz<sup>a</sup>, Aleksandra Jaworska<sup>a</sup>, Jakub Szymarek<sup>c</sup> and Maria Mazurkiewicz-Betdzińska<sup>c</sup>

<sup>a</sup> Chair of Environmental Chemistry and Bioanalytics, Faculty of Chemistry, Nicolaus Copernicus University in Toruń, 7 Gagarin St., 87-100 Toruń (Poland); kowalska@chem.umk.pl

<sup>b</sup> Centre for Modern Interdisciplinary Technologies, Nicolaus Copernicus University in Toruń, 4 Wilenska St., 87-100 Toruń, Poland.

<sup>c</sup> Department of Developmental Neurology, Medical University of Gdansk, 7 Dębinki Str., PL-80-952, Gdańsk, Poland.

## STRUCTURES OF METABOLITES

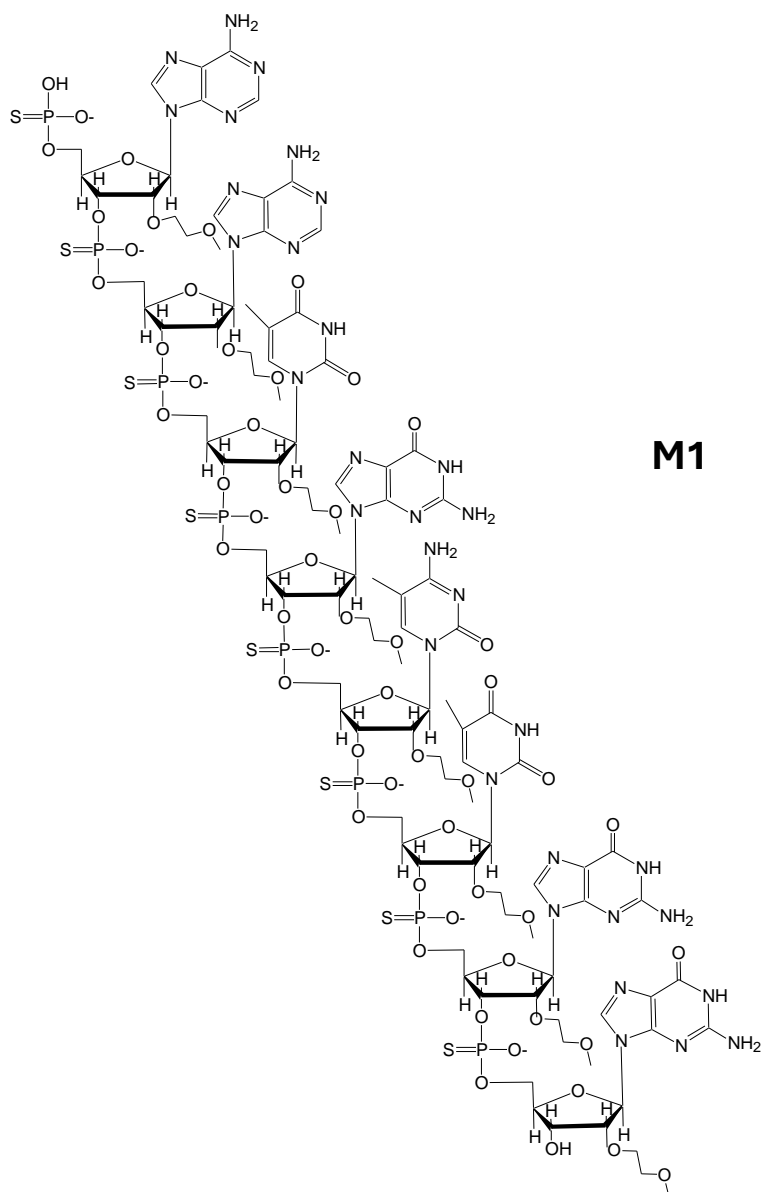

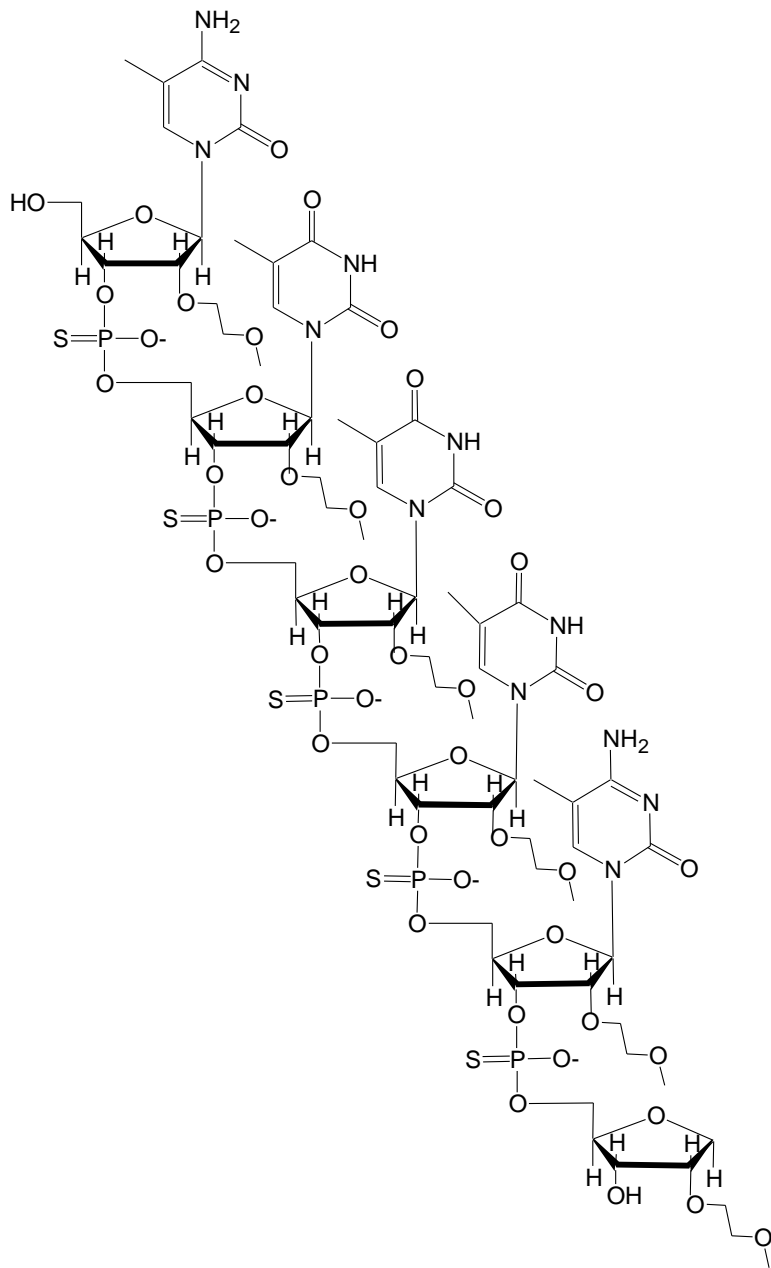

M2

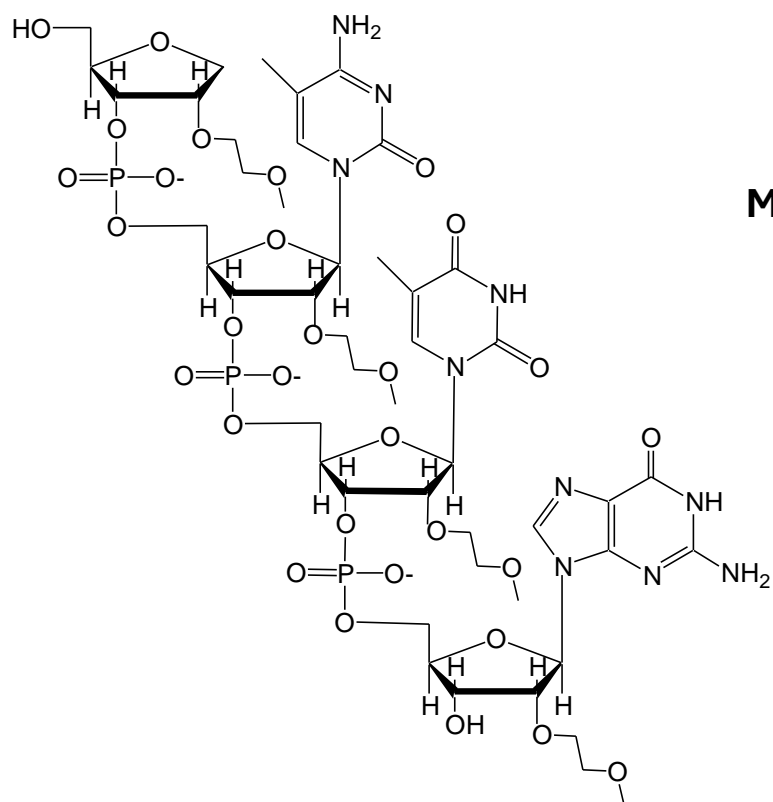

M3

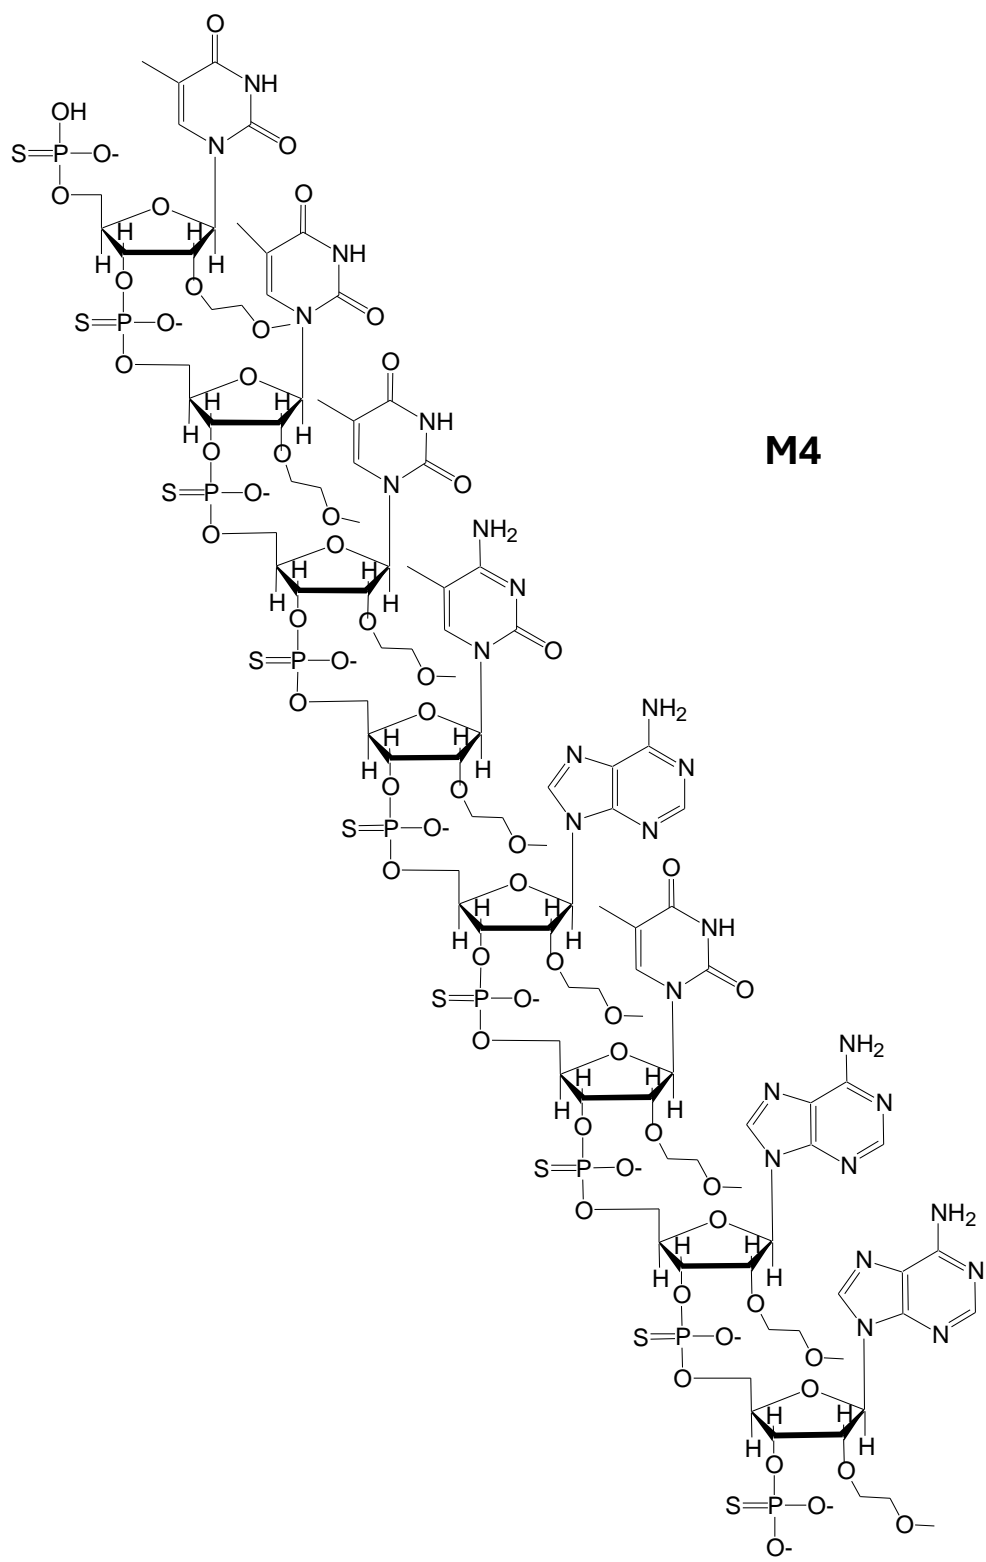

**M4**

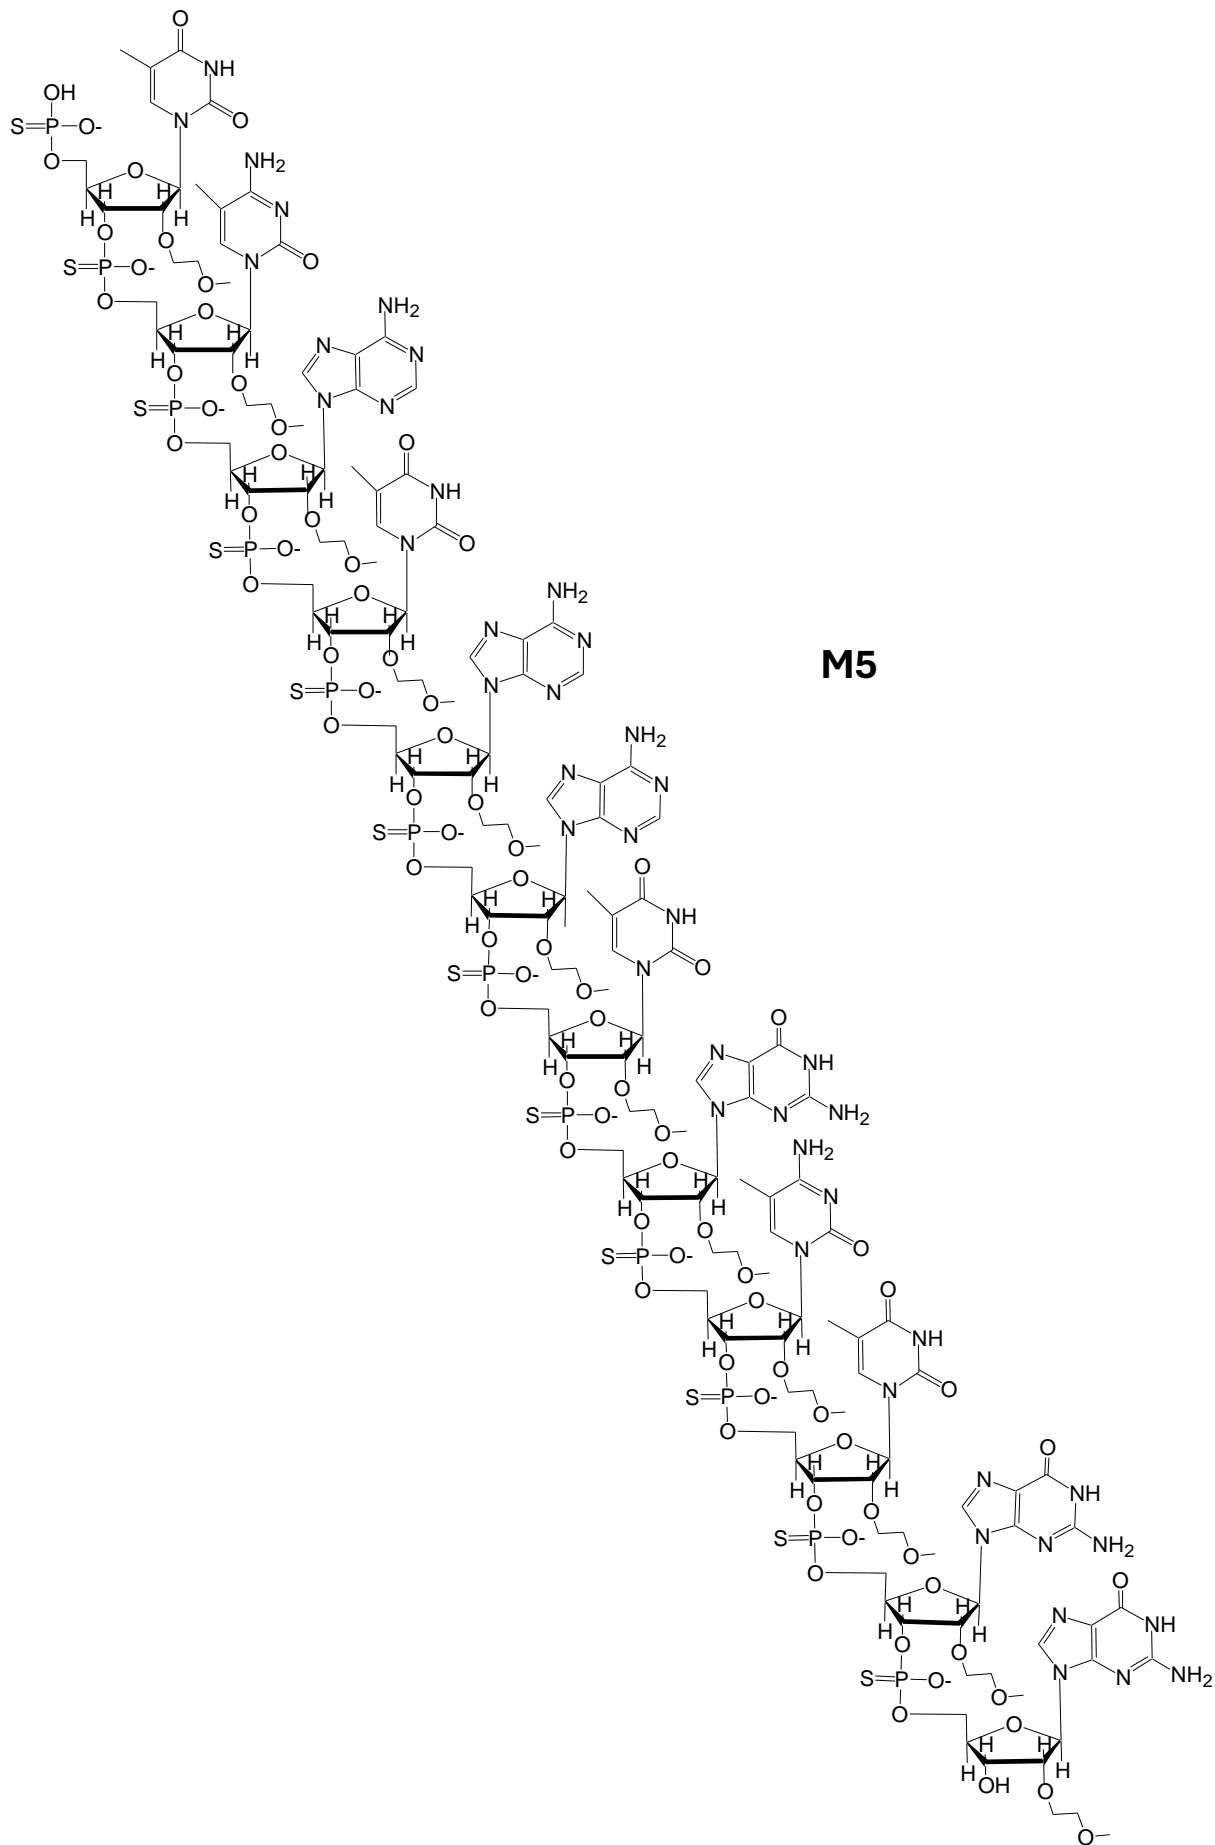

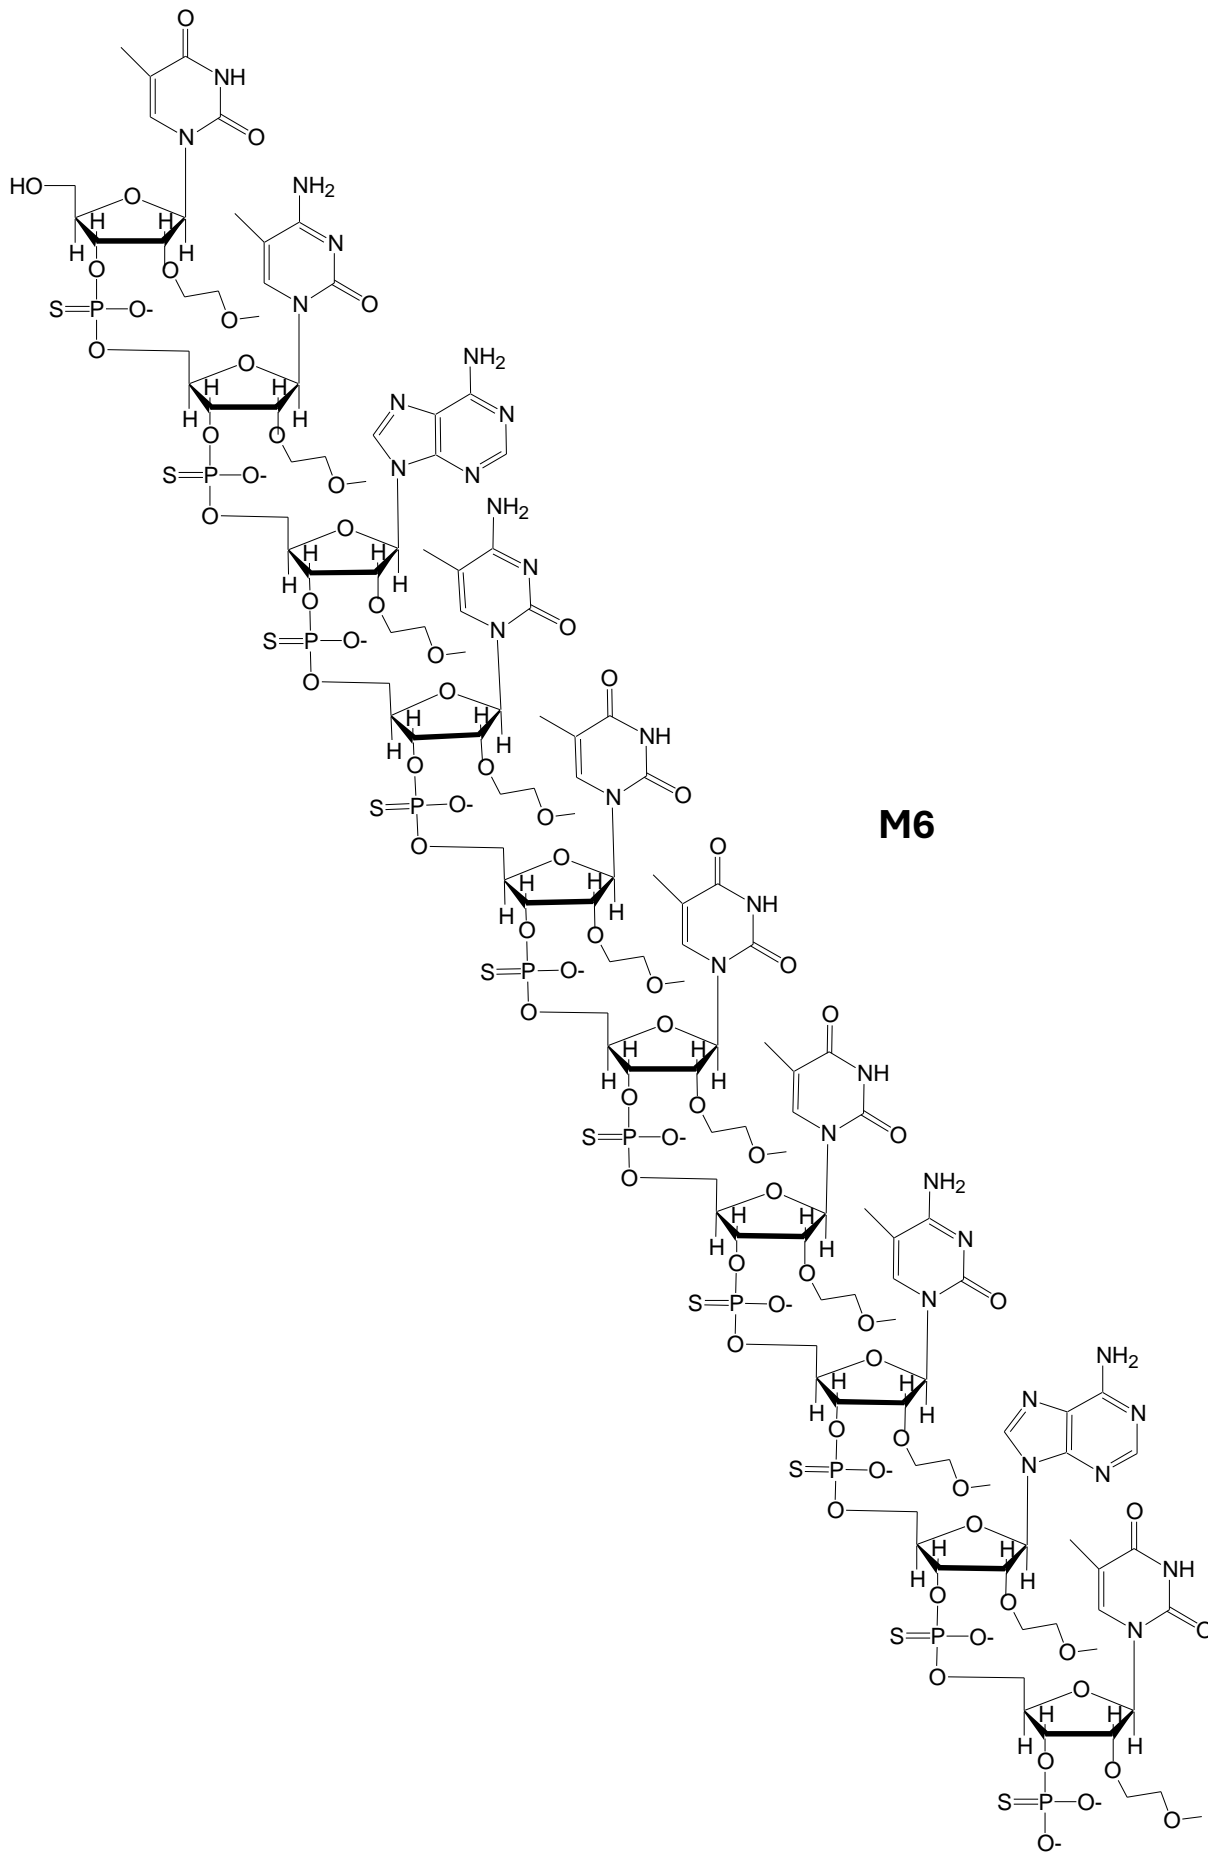

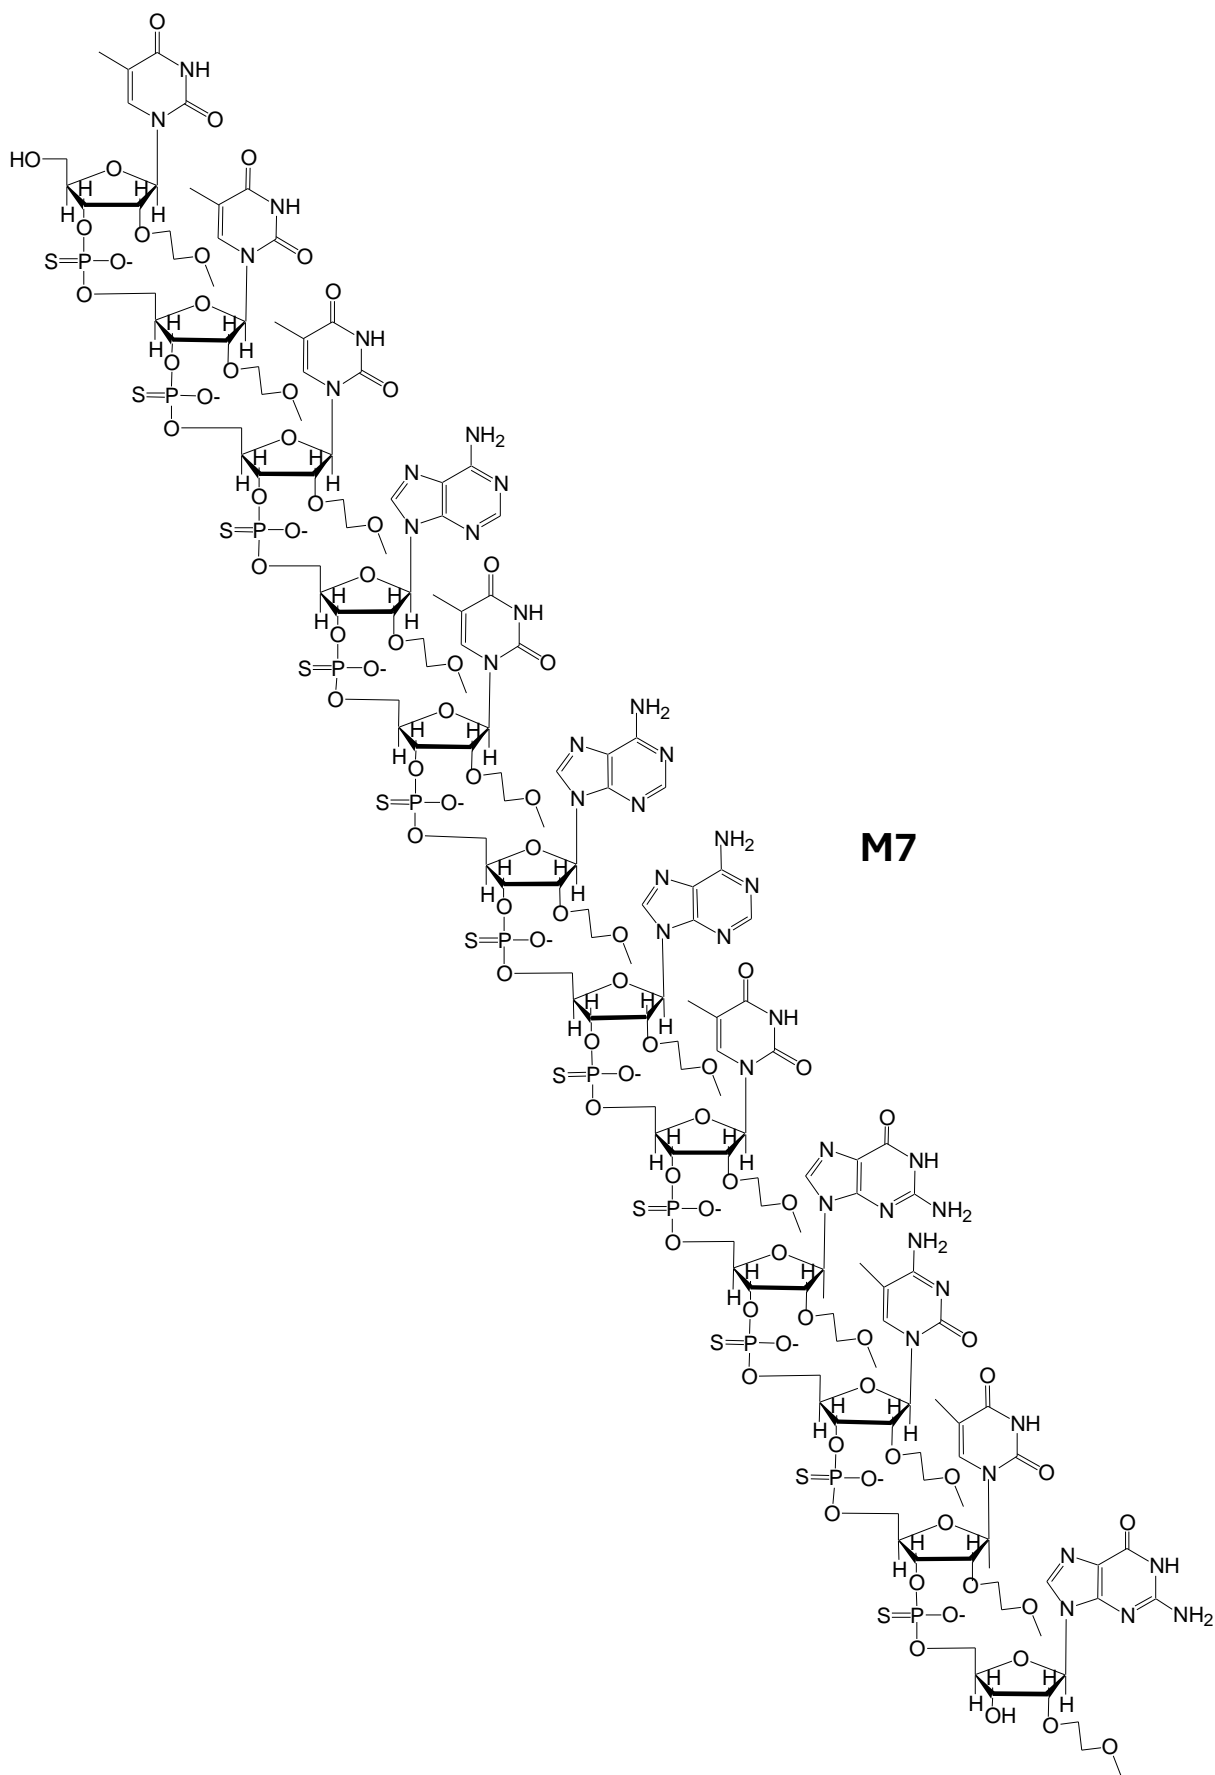

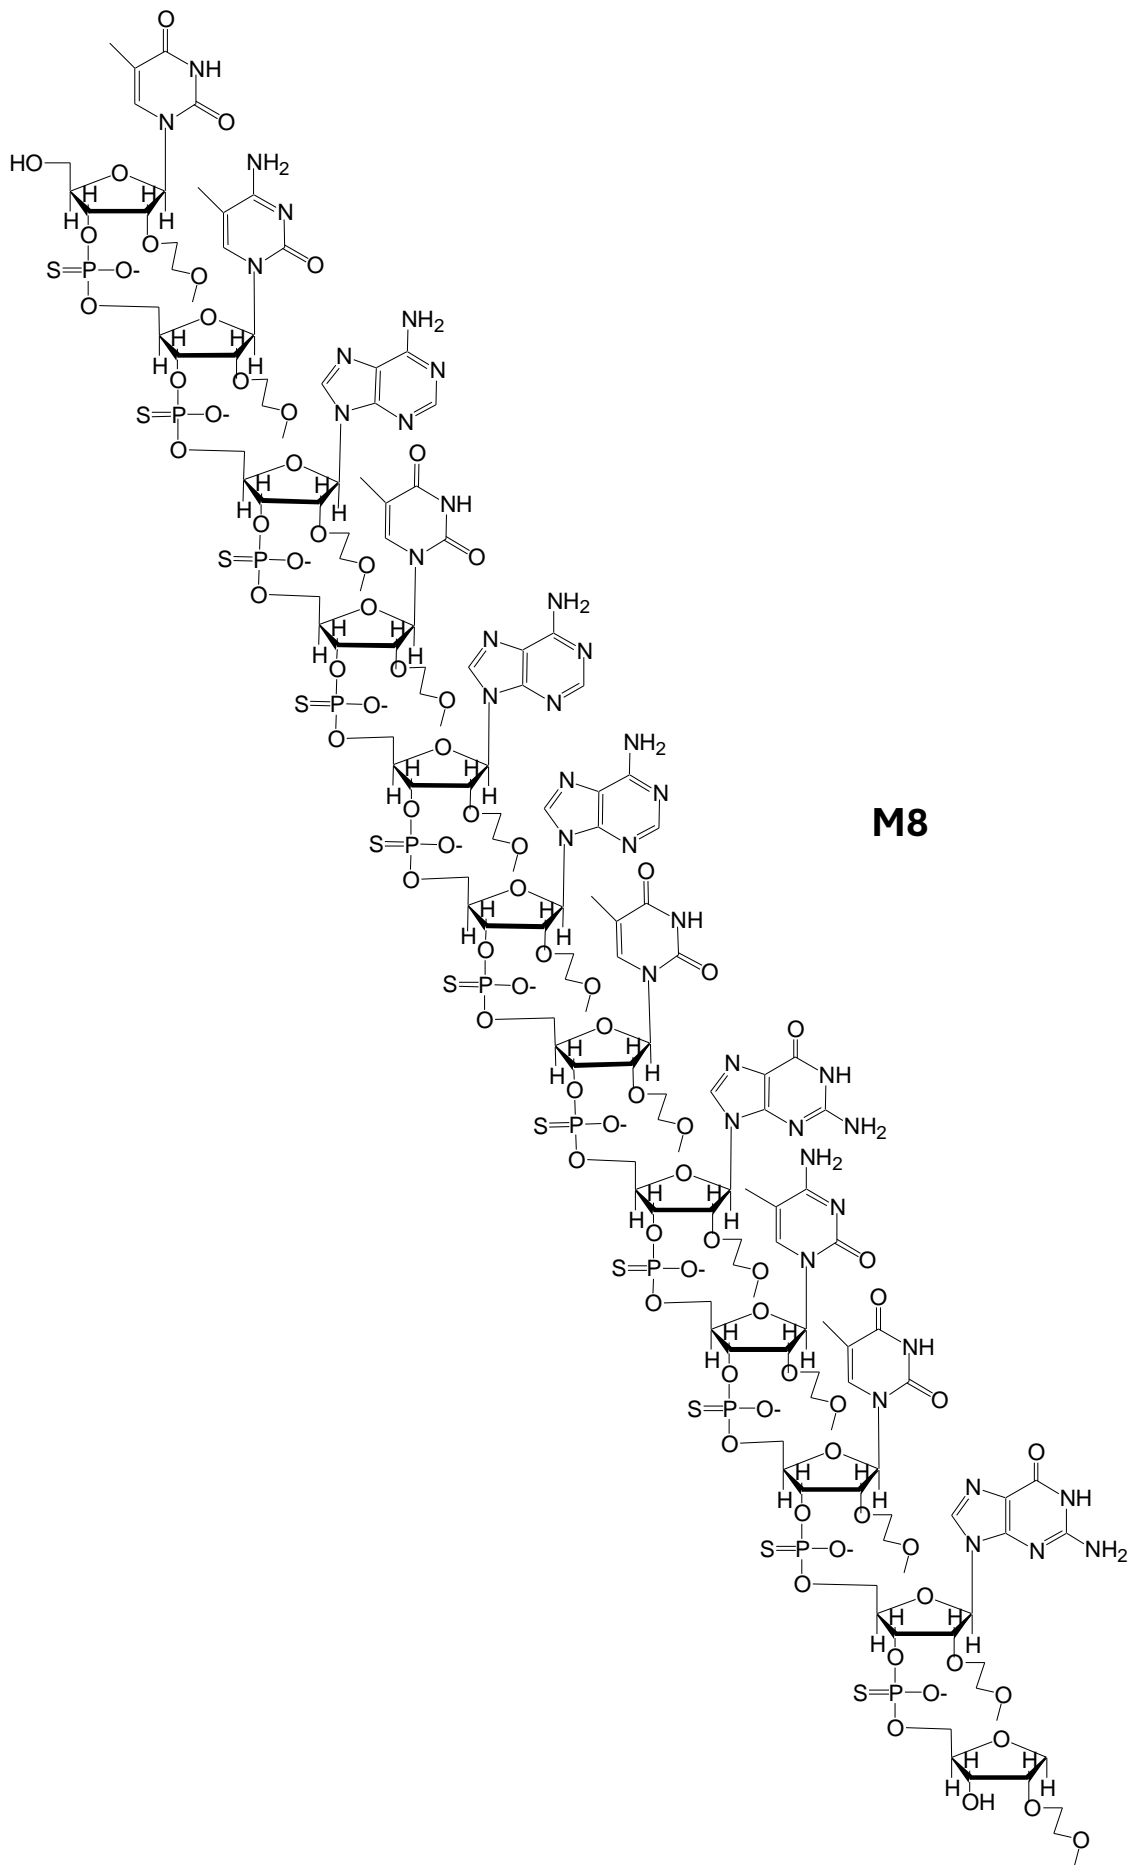



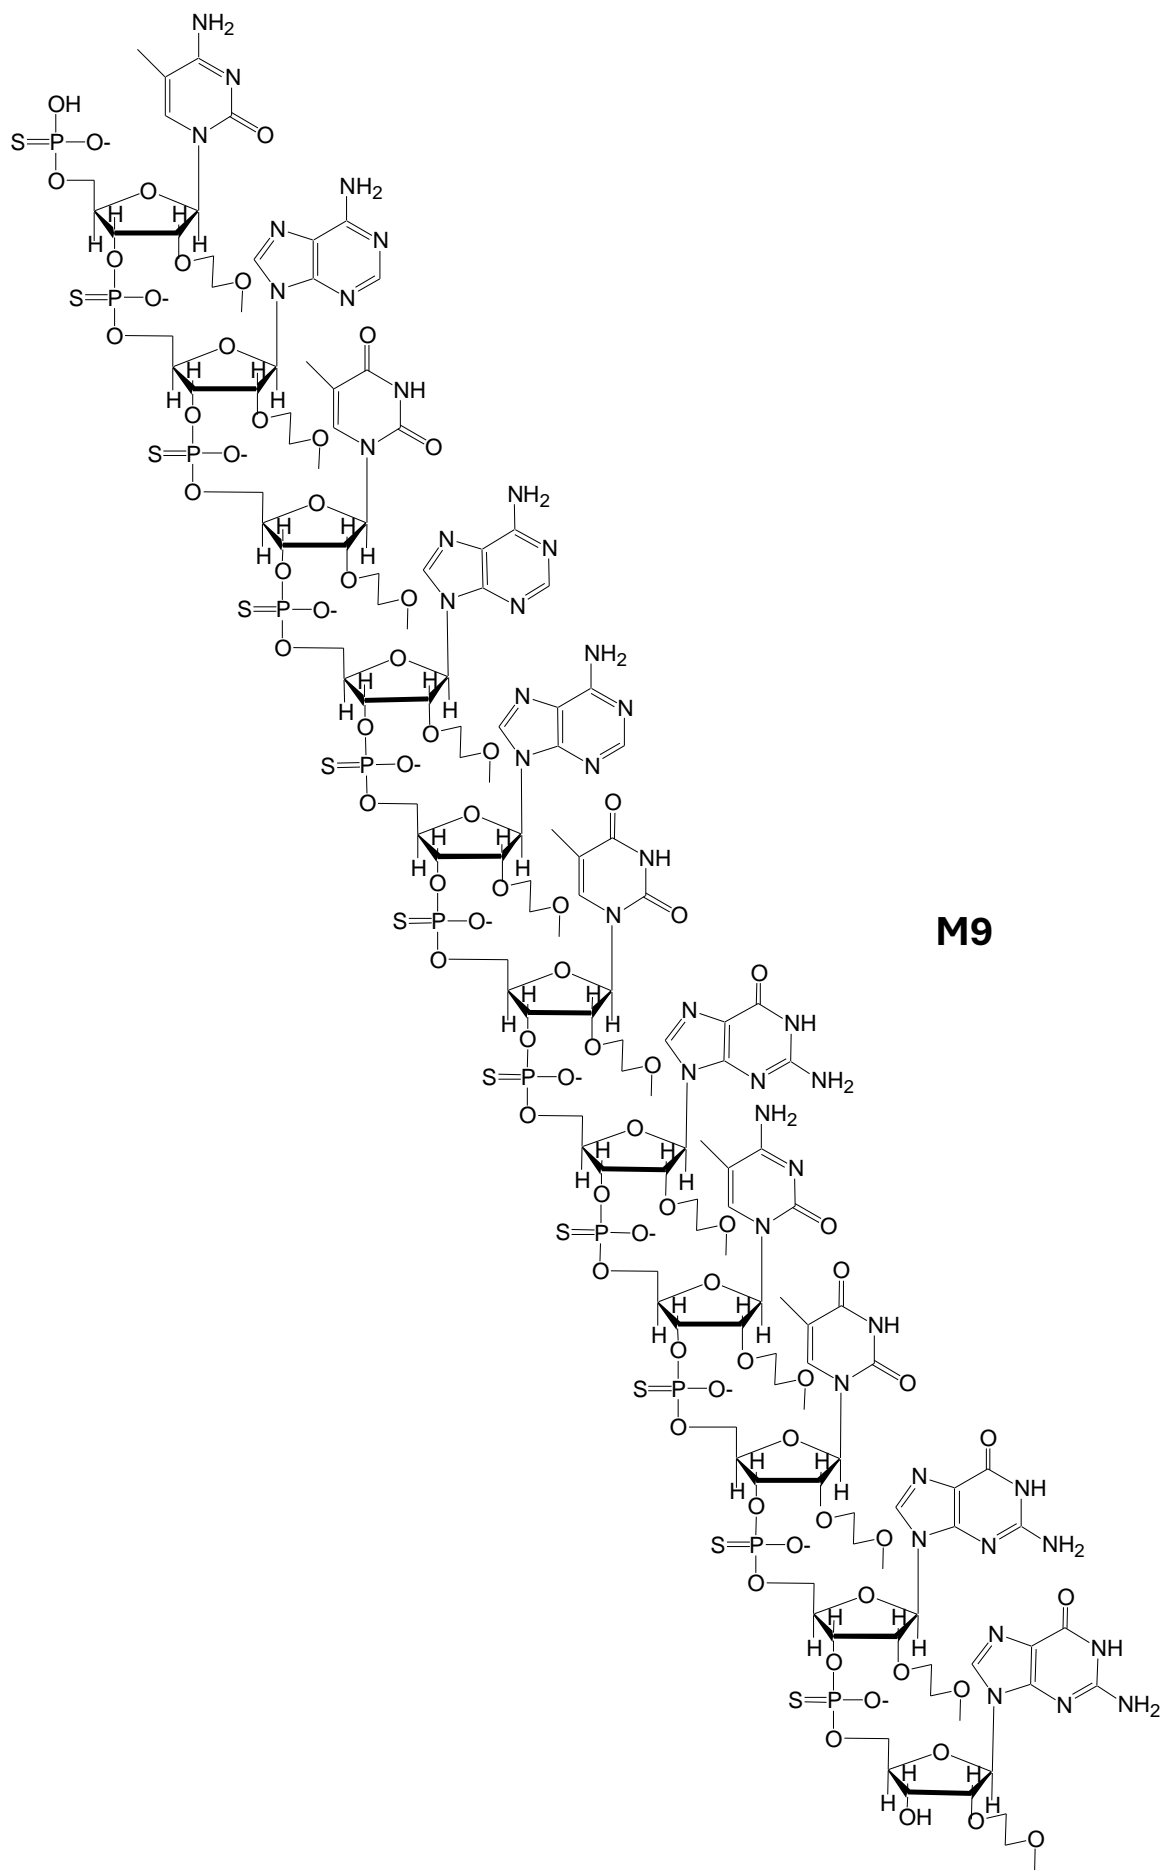

**M9**

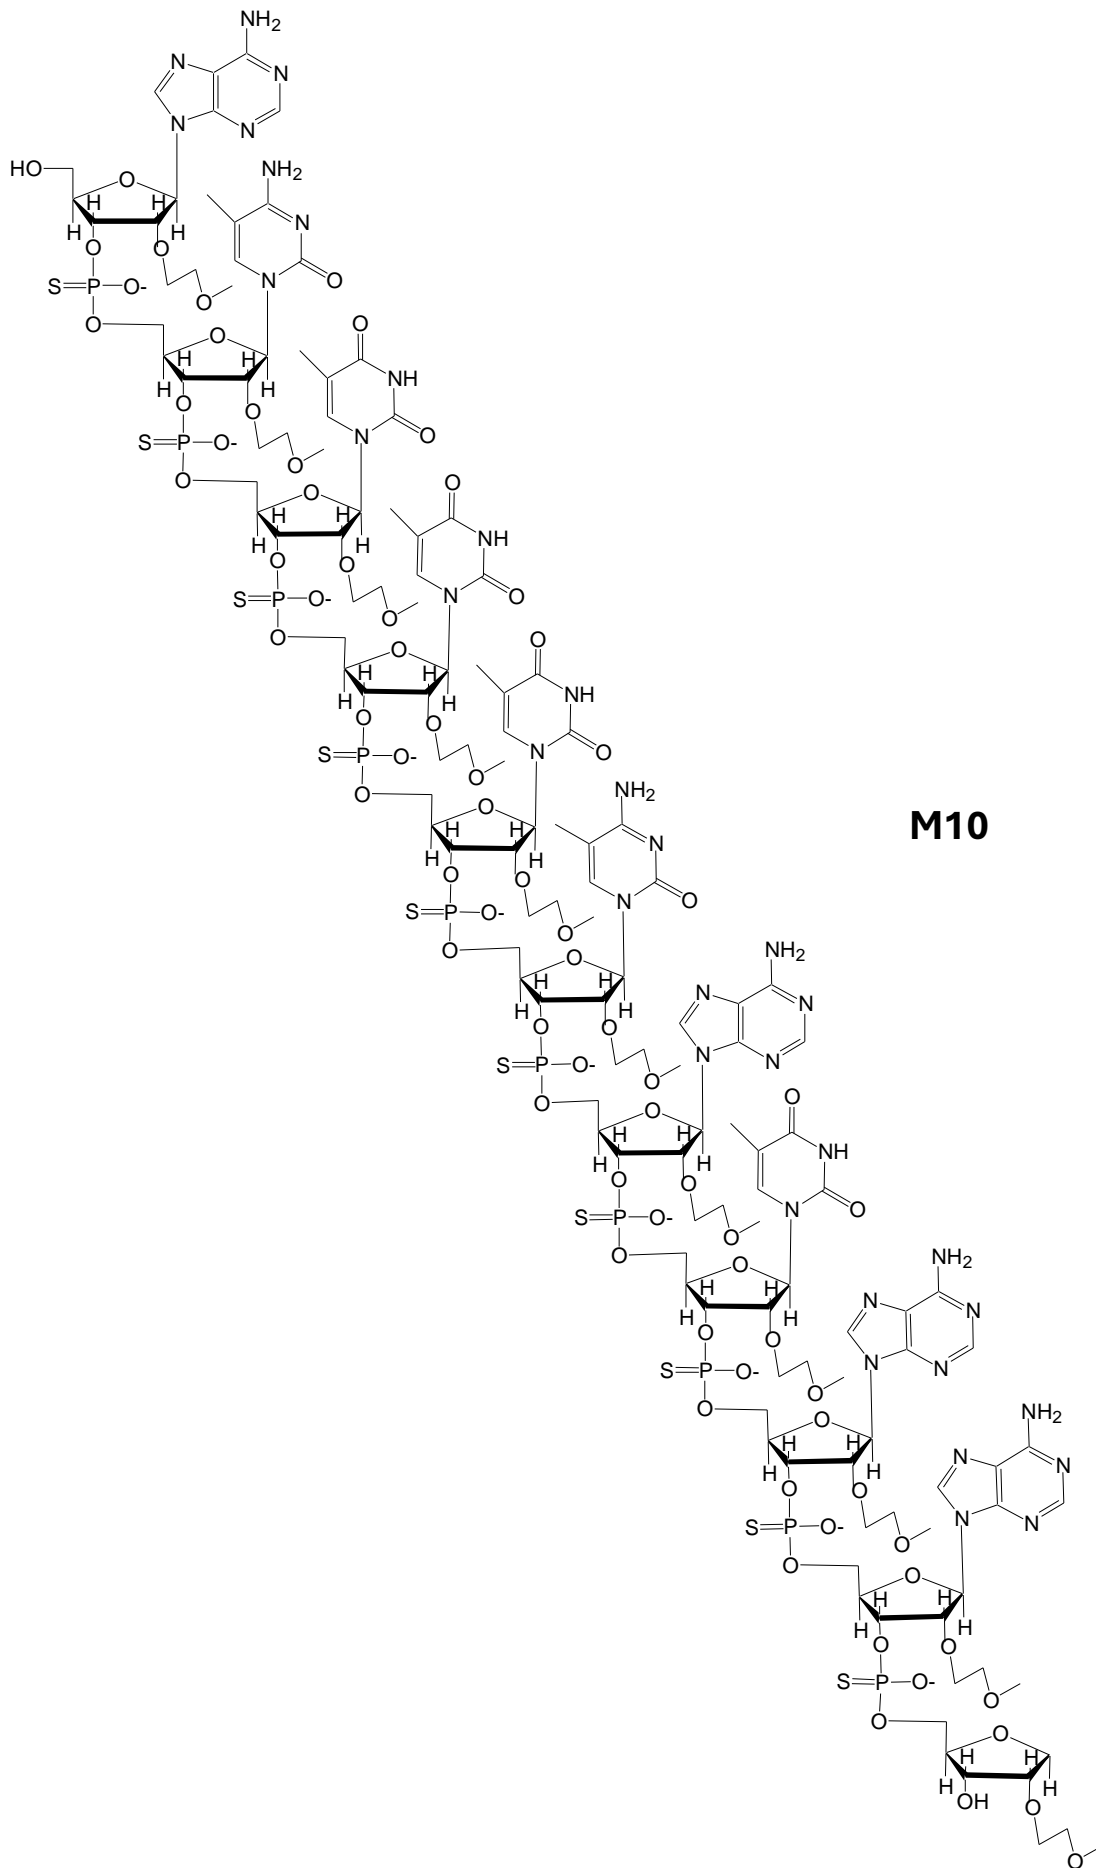

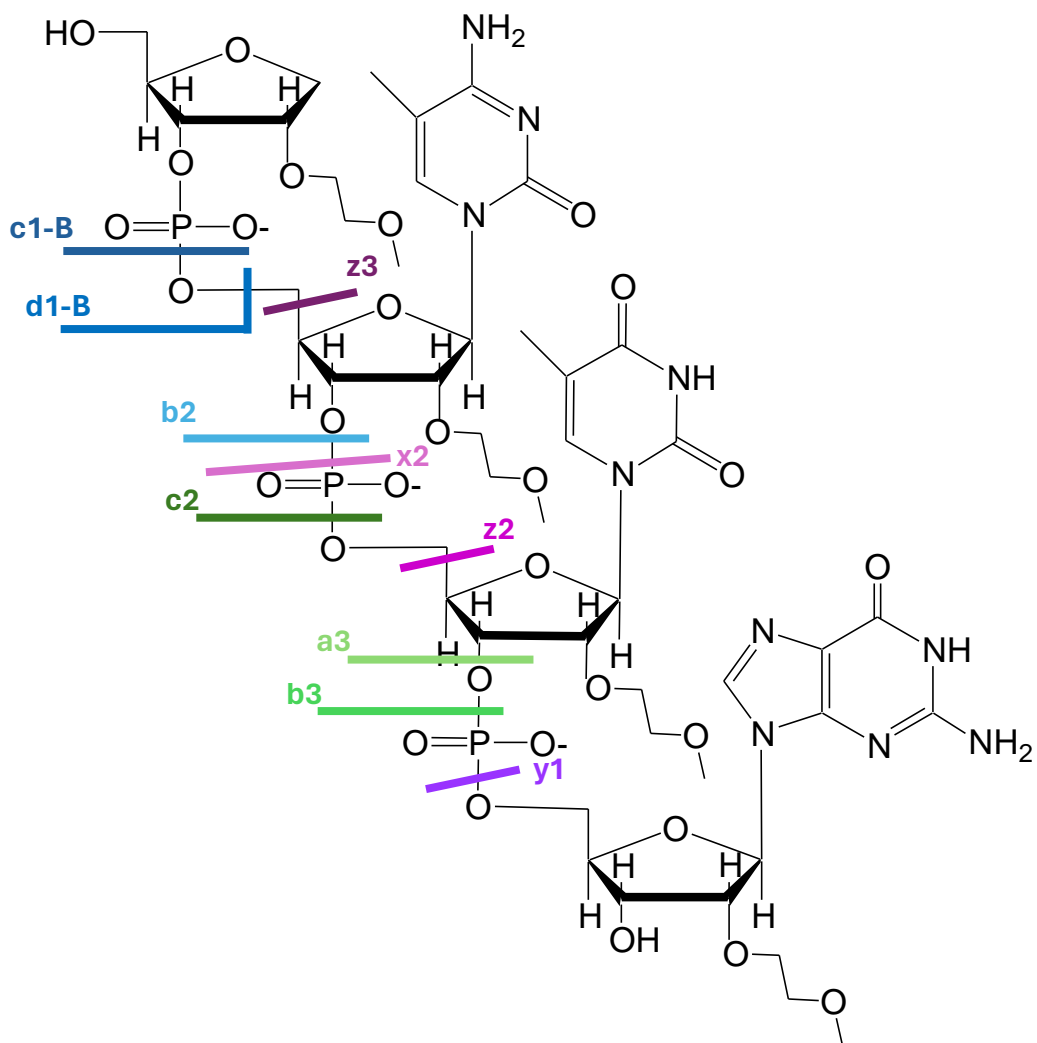

**Scheme with indication of the fragmentation sites of the M3 metabolite (fragmentation spectrum shown in Figure 4B).**
